# Supplementary material
Source: PubMed Central journal article supplement (PMC11105377)

# D2A SEQUENCE OF THE UROKINASE RECEPTOR INDUCES CELL GROWTH THROUGH $\alpha v\beta 3$ INTEGRIN AND EGFR

## Cellular and Molecular Life Sciences

**Gabriele Eden<sup>1,5</sup>, Marco Archinti<sup>2</sup>, Ralitsa Arnaudova<sup>2</sup>, Giuseppina Andreotti<sup>3</sup>, Andrea Motta<sup>3</sup>, Federico Furlan<sup>2,6</sup>, Valentina Citro<sup>4</sup>, Maria Vittoria Cubellis<sup>4</sup>, Bernard Degryse<sup>2,\*</sup>**

<sup>1</sup>IFOM, FIRC Institute of Molecular Oncology, Via Adamello 16, 20139 Milan, Italy

<sup>2</sup>Dept. of Molecular Biology and Functional Genomics, DIBIT, Università Vita-Salute San Raffaele, Via Olgettina 58, 20132 Milan, Italy

<sup>3</sup>Istituto di Chimica Biomolecolare, Consiglio Nazionale delle Ricerche, Via Campi Flegrei 34, 80078 Pozzuoli (Napoli), Italy

<sup>4</sup>Dipartimento di Biologia, Università Federico II, Naples, Italy

<sup>5</sup>Present address: Medical Clinic V, Teaching Hospital Braunschweig, Salzdahlumer Straße 90, 38126 Braunschweig, Germany

<sup>6</sup>Present address: BoNetwork Programme, San Raffaele Scientific Institute. Milan, Italy

**\*Corresponding author:** Dr. Bernard Degryse  
E-mail: bdegryse@yahoo.com

## **CAPTIONS FOR ONLINE RESOURCES**

### **Online Resource 1. EGF regulates cell morphology and induces detachment of HT-29 cells.**

EGF promotes cell proliferation along with cell rounding and detachment from substrate. HT-29 cells were treated with increasing doses of EGF ranging from 1 ng/ml up to 100 ng/ml, then low magnification pictures were taken after 4 days of culture. Quantification of these effects is shown in Fig. 2a.

### **Online Resource 2. EGF enhances proliferation of HT-1080 cells.**

HT-1080 cells were treated with increasing doses of EGF ranging from 1 ng/ml up to 100 ng/ml. Cell number was determined after 4 days of culture and is represented as mean  $\pm$  SD from three experiments. The number of HT-1080 cells kept in serum-free media without EGF is referred to as 100% proliferation (control). \*\*,  $p < 0.01$  compared to control.

## Online Resource 1

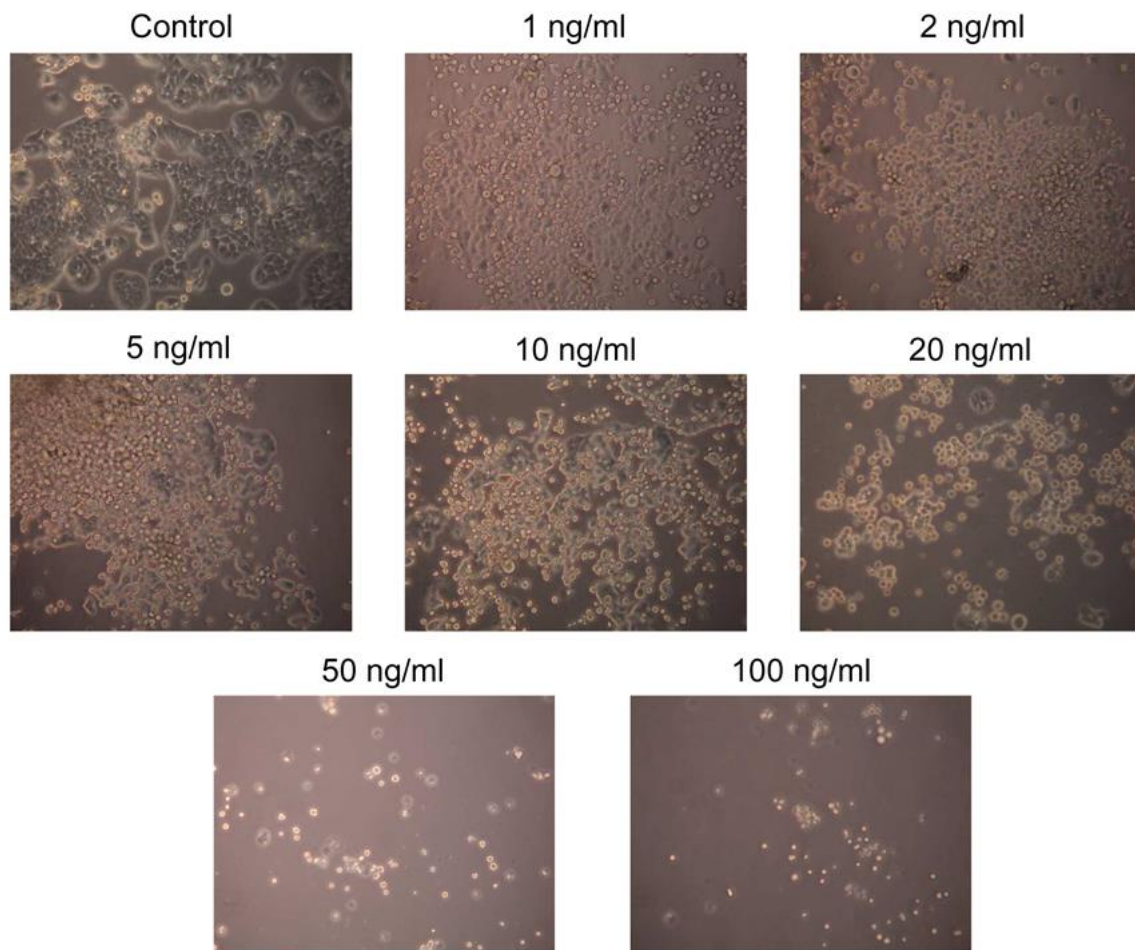

## Online Resource 2

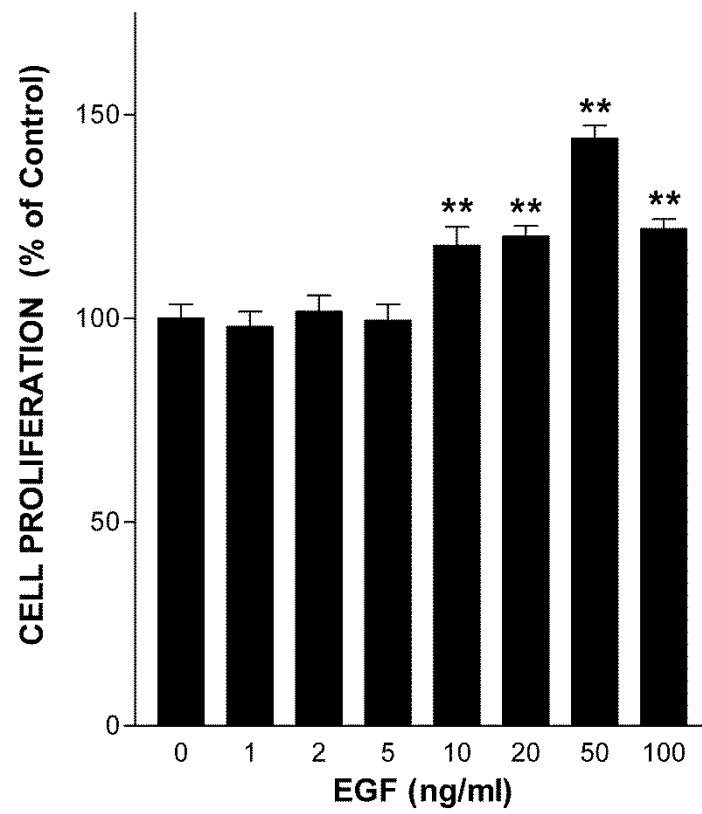

Supplement: 18_2017_2718_MOESM1_ESM.pdf [file 18_2017_2718_MOESM1_ESM.pdf]
